# Supplementary material
Source: PubMed Central journal article supplement (PMC6004255)
Supplement: NIHMS961331-supplement-1.pdf [file NIHMS961331-supplement-1.pdf]

**A**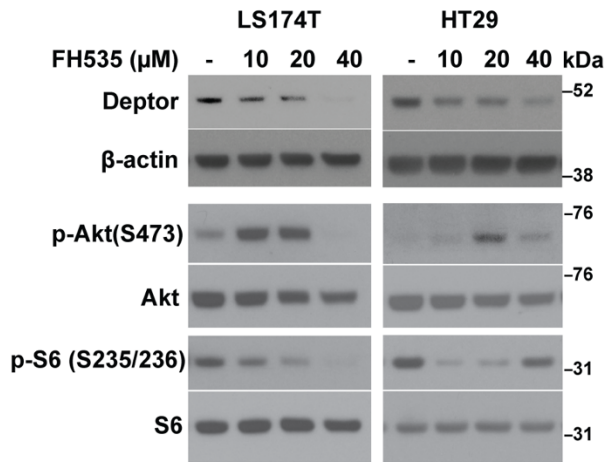**B**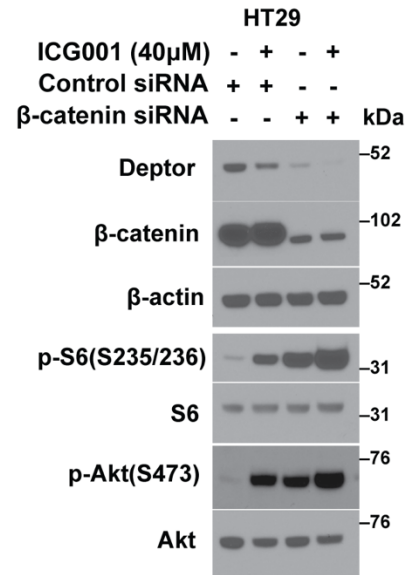**C**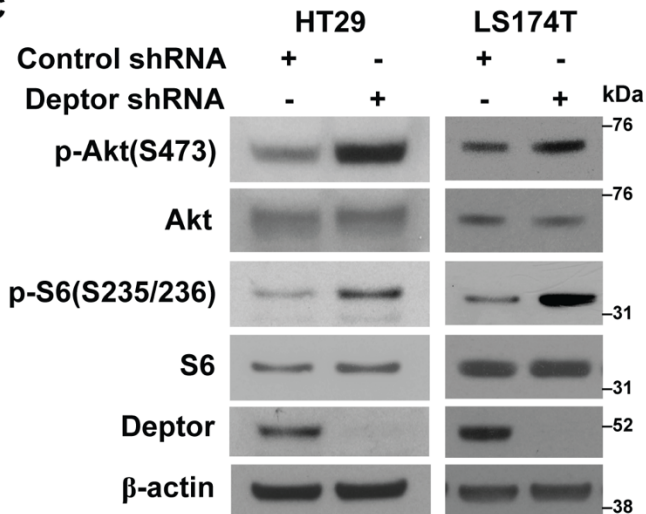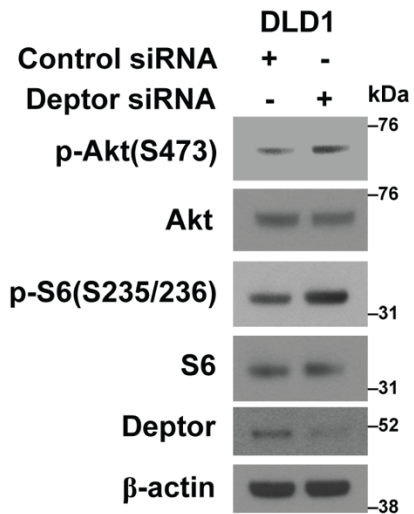**D**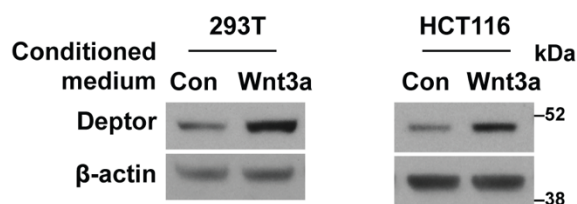**E**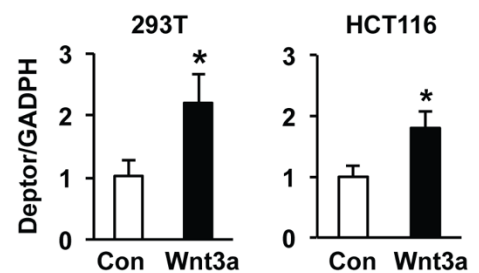

**Supplemental figure 1. Deptor is a target gene of Wnt signaling.** **A.** Treatment with Wnt inhibitor FH353 decreases Deptor protein expression in CRC cells. LS174T and HT29 cells were treated with Wnt inhibitor FH353 for 24 h. Cells were lysed and western blot analysis was performed using antibodies

against Deptor, p-Akt, Akt, p-S6, S6, and  $\beta$ -actin. **B.** Knockdown of  $\beta$ -catenin attenuates the effect of ICG001 treatment. HT29 cells were transfected with  $\beta$ -catenin or non-targeting control siRNA. After 48 h incubation, transfected cells were treated with ICG001 (40  $\mu$ M) for 24 h. Cell lysates were subjected to western blot analysis for the indicated proteins. **C.** Knockdown of Deptor results in mTOR activation in HT29, LS174T and DLD1 cells. Cells were lysed and western blot analysis was performed using antibodies against Deptor, p-Akt, Akt, p-S6, S6, and  $\beta$ -actin. **D&E.** Activation of Wnt signaling increases Deptor expression. 293T and HCT116 cells were incubated with control-conditioned medium or Wnt3a-conditioned medium for 24 h and western blot (**D**) and real time RT-PCR (**E**) assays performed. (n=3, data represent means  $\pm$  SEM; \*P<0.01 versus control medium).
